# Supplementary material
Source: PubMed Central journal article supplement (PMC7859723)

**Figure S2A.** Gene ontology terms of candidate targets of Yangyinjiedu (YYJD) against COVID-19. The top 20 GO functional categories with FDR<0.05 are presented.

**a. Biological Process**

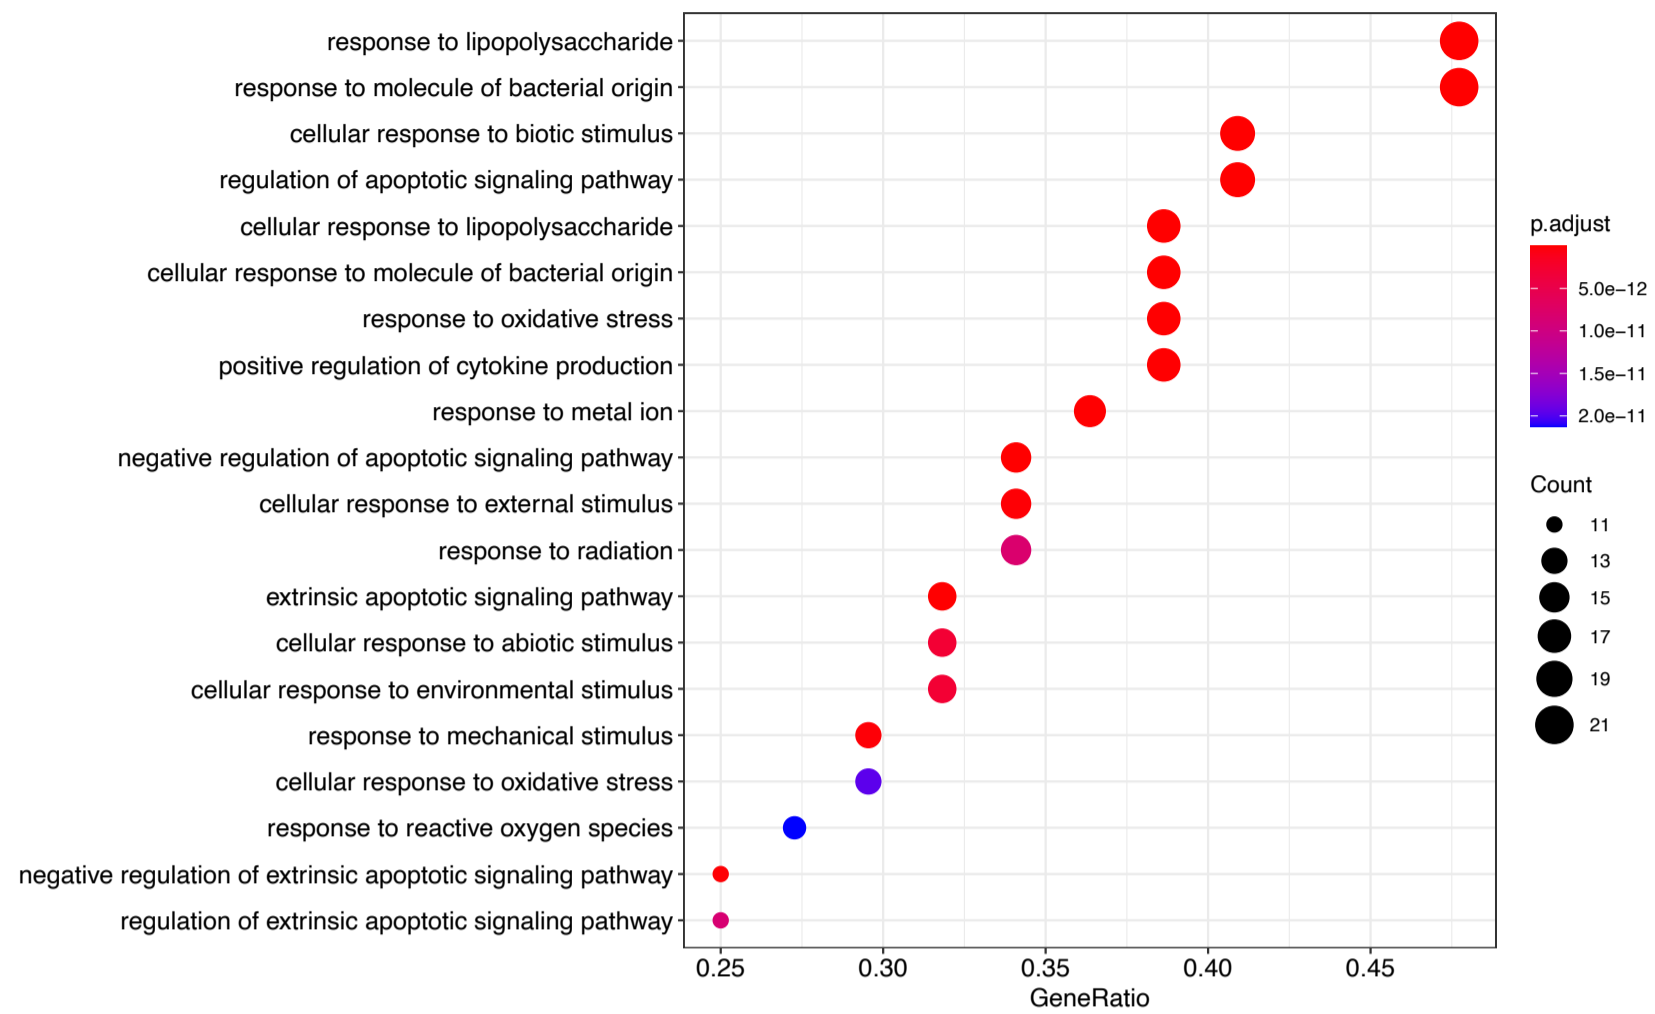

**b. Cellular Component**

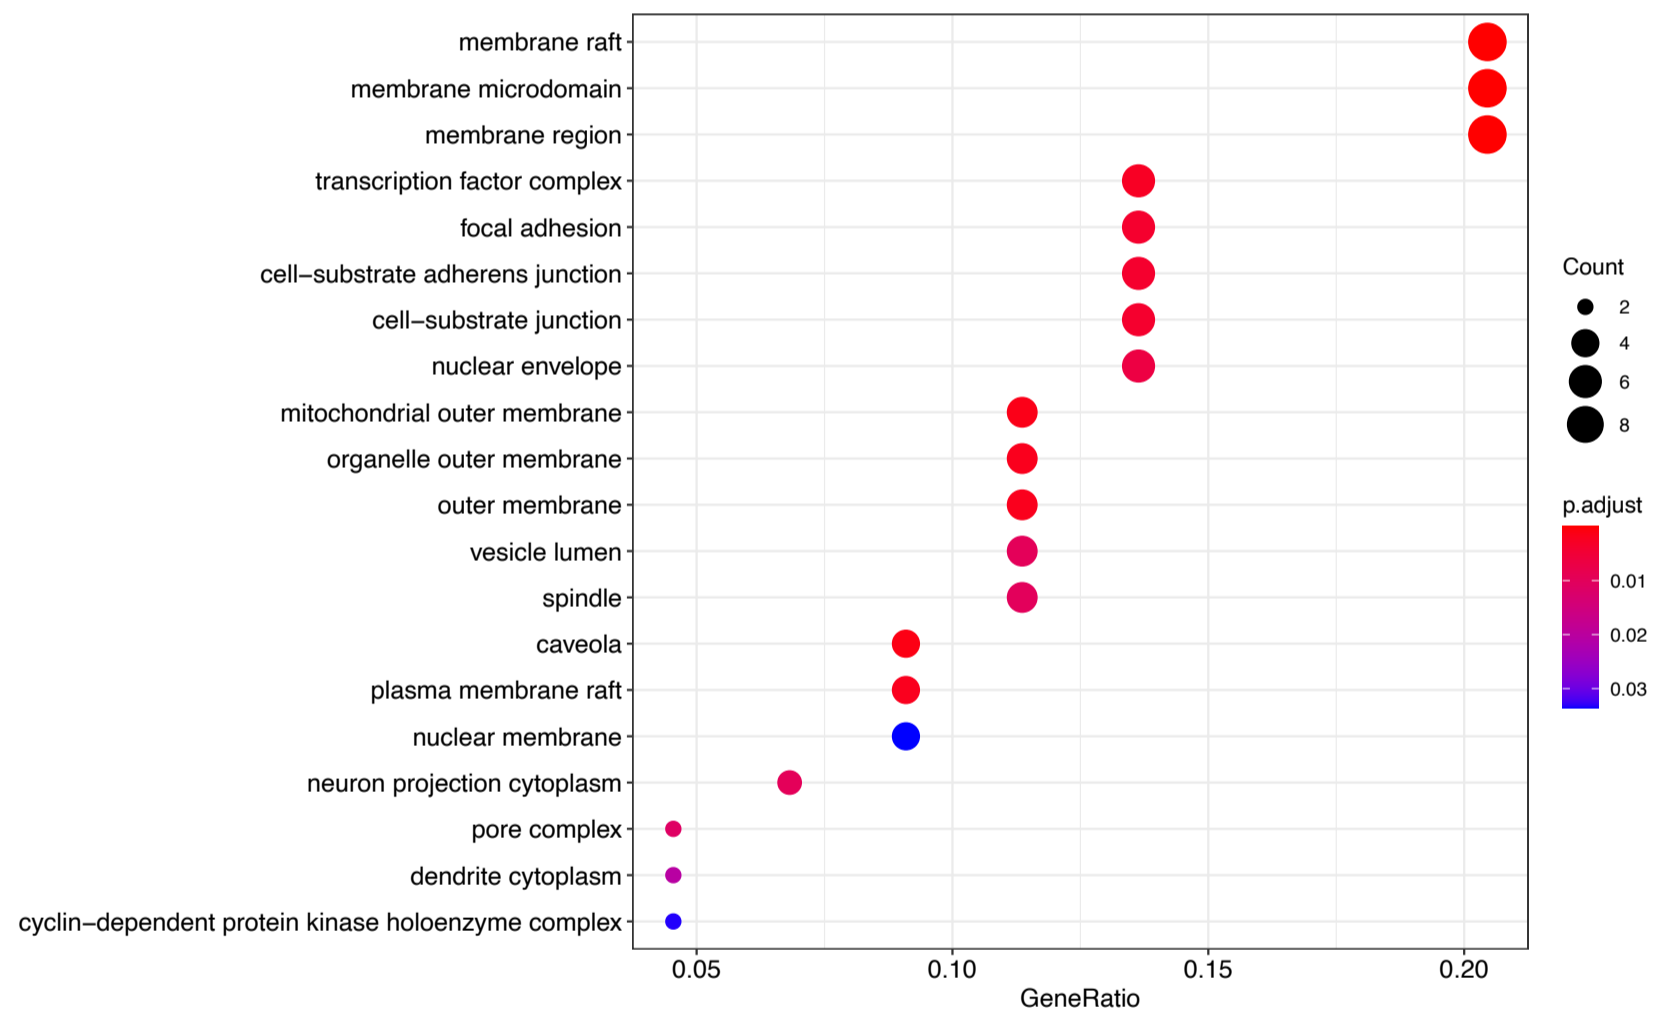

**c. Molecular Function**

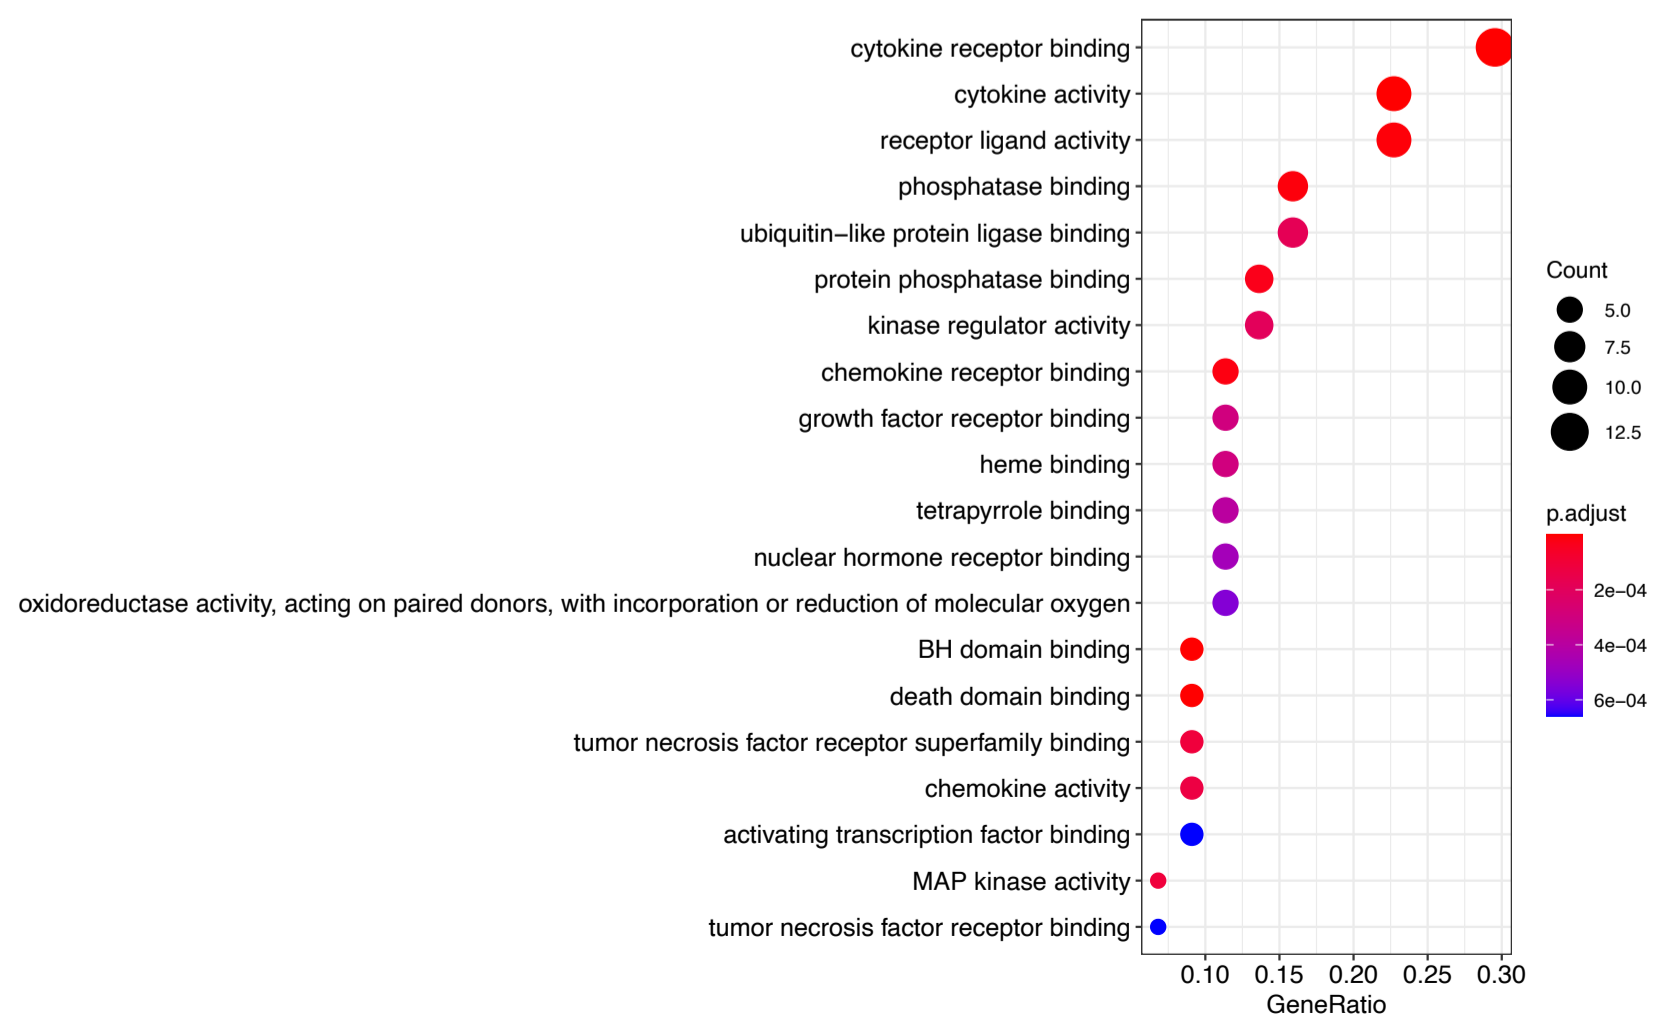

Supplement: mmc2.pdf [file mmc2.pdf]
