# Supplementary material
Source: PubMed Central journal article supplement (PMC7859723)

**Figure S2B.** Gene ontology terms of candidate targets of Dayuanxiaodu (DYXX) against COVID-19. The top 20 GO functional categories with  $P\text{-adjust} < 0.05$  are presented.

**a. Biological Process**

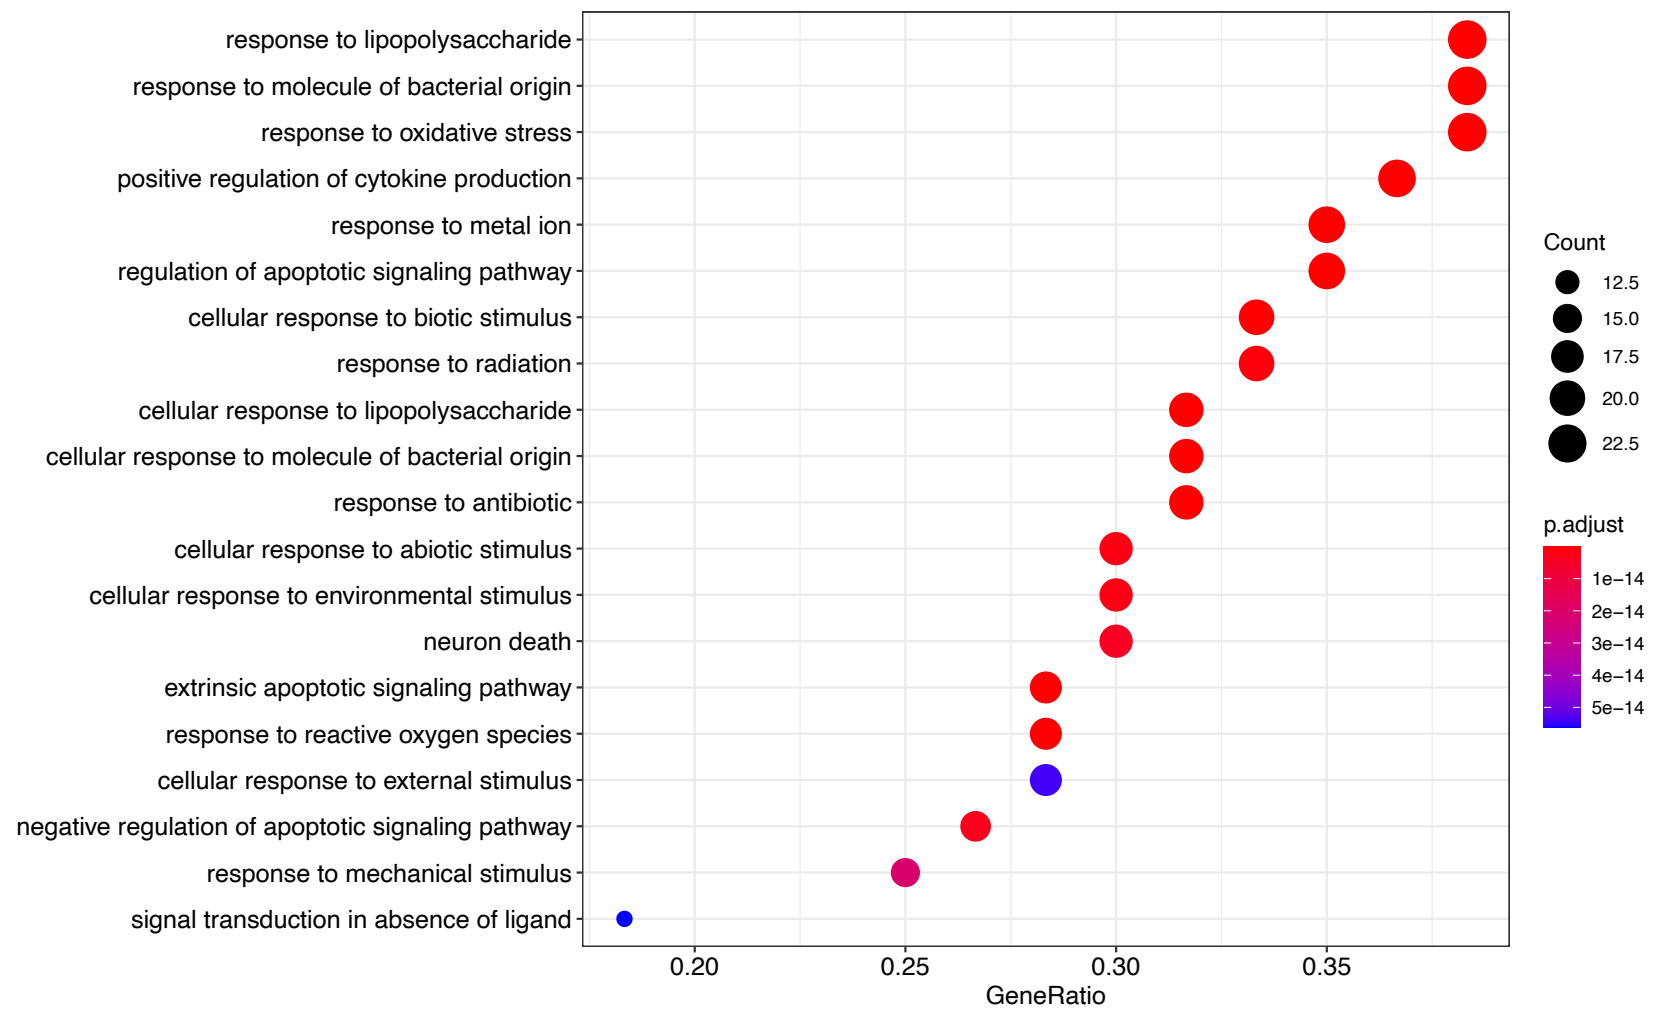

**b. Cellular Component**

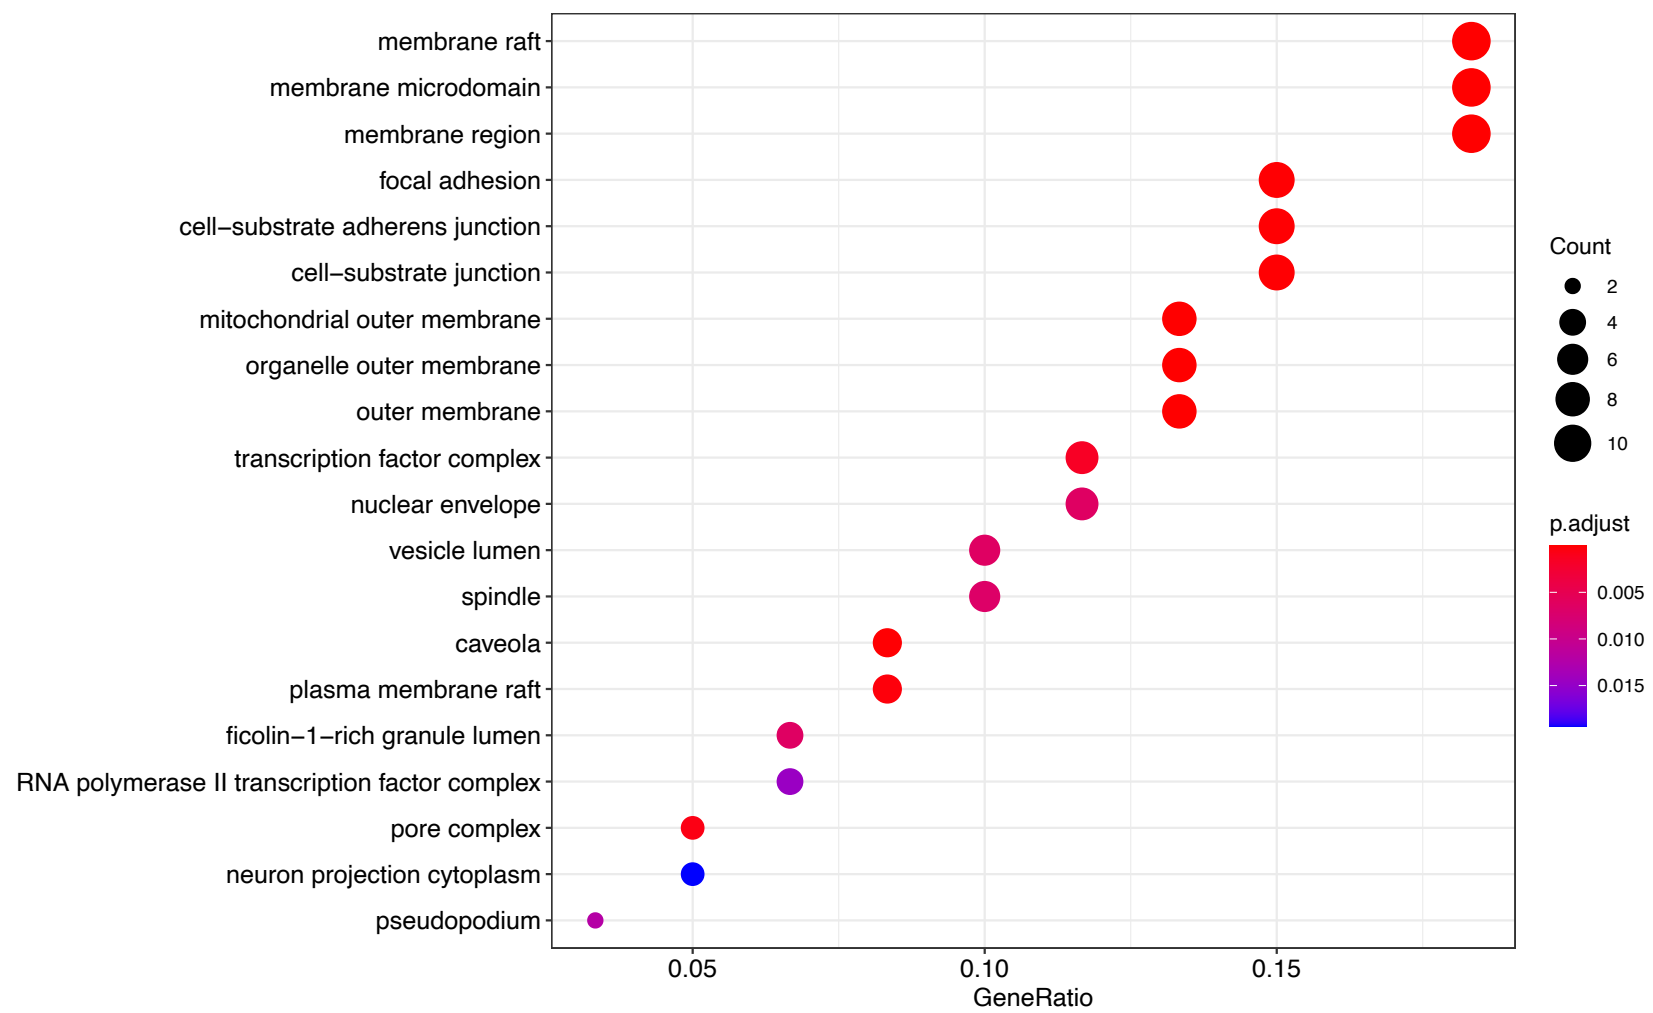

**c. Molecular Function**

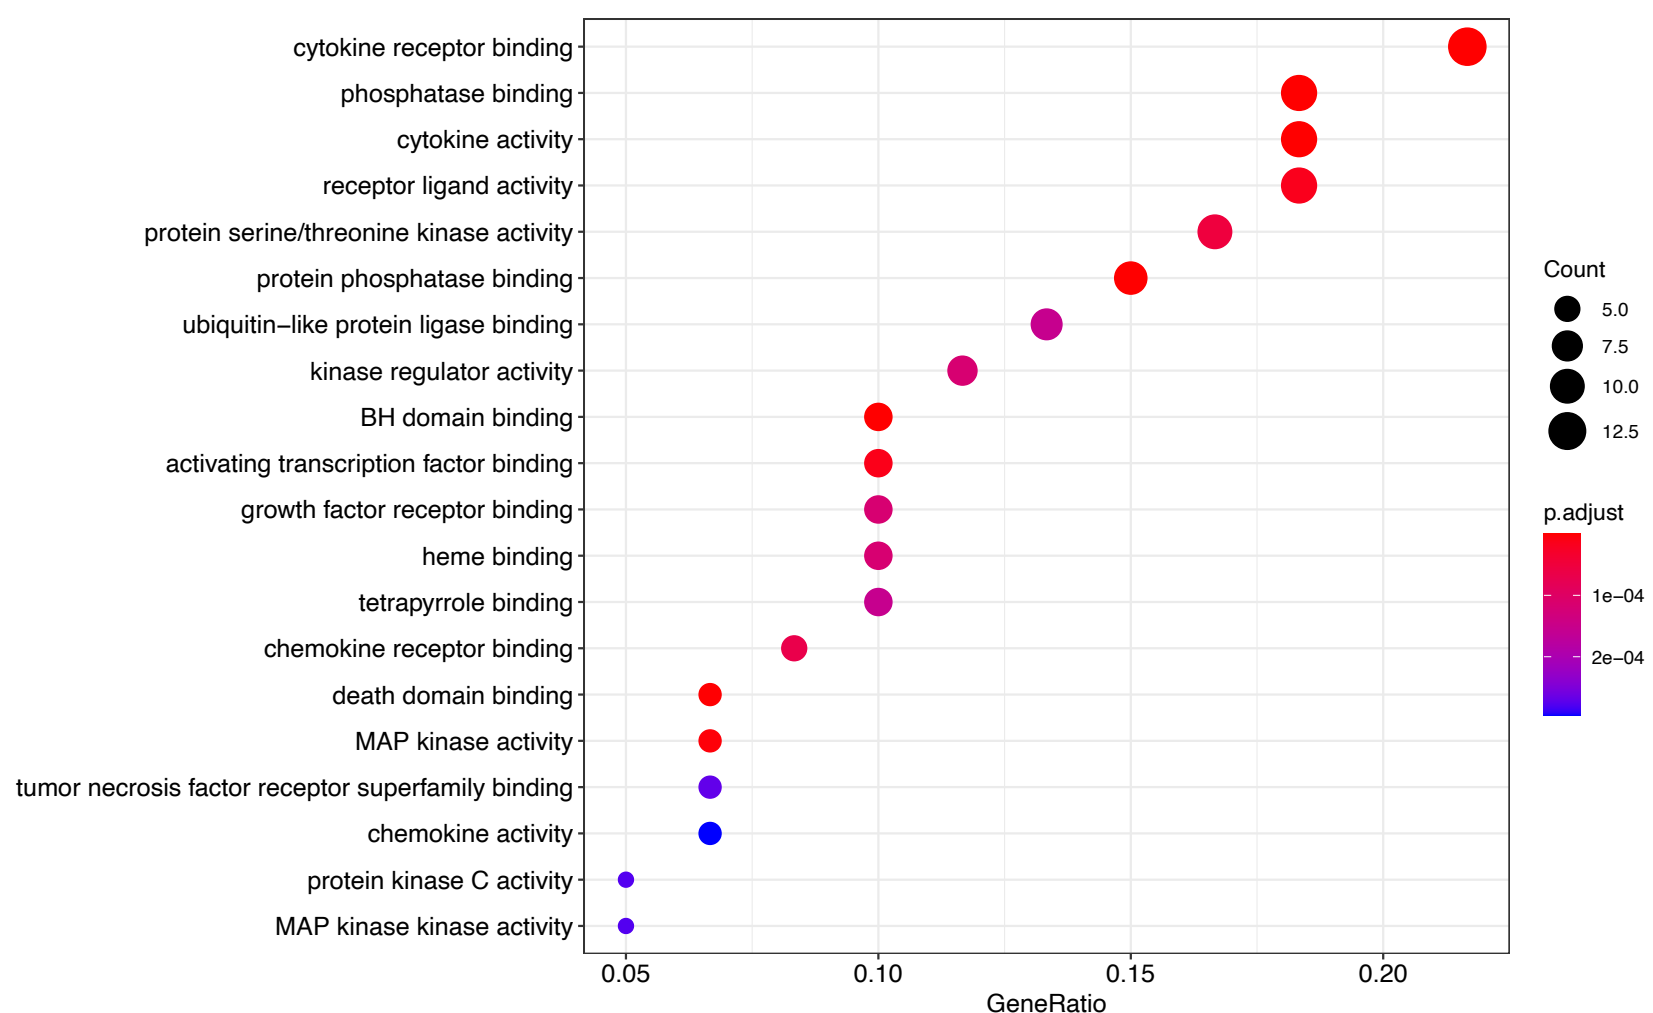

Supplement: mmc3.pdf [file mmc3.pdf]
