# Supplementary material
Source: PubMed Central journal article supplement (PMC7859723)

**Figure S3.** KEGG pathway enrichment analysis of candidate targets of A. Yangyinjiedu (YYJD), B. Dayuanxiaodu (DYXX) and C. Chaihuqingzao (CHQZ) against COVID-19. The bar graph shows the pathways with significant P-adjust <0.05.

**a. Yangyinjiedu (YYJD)**

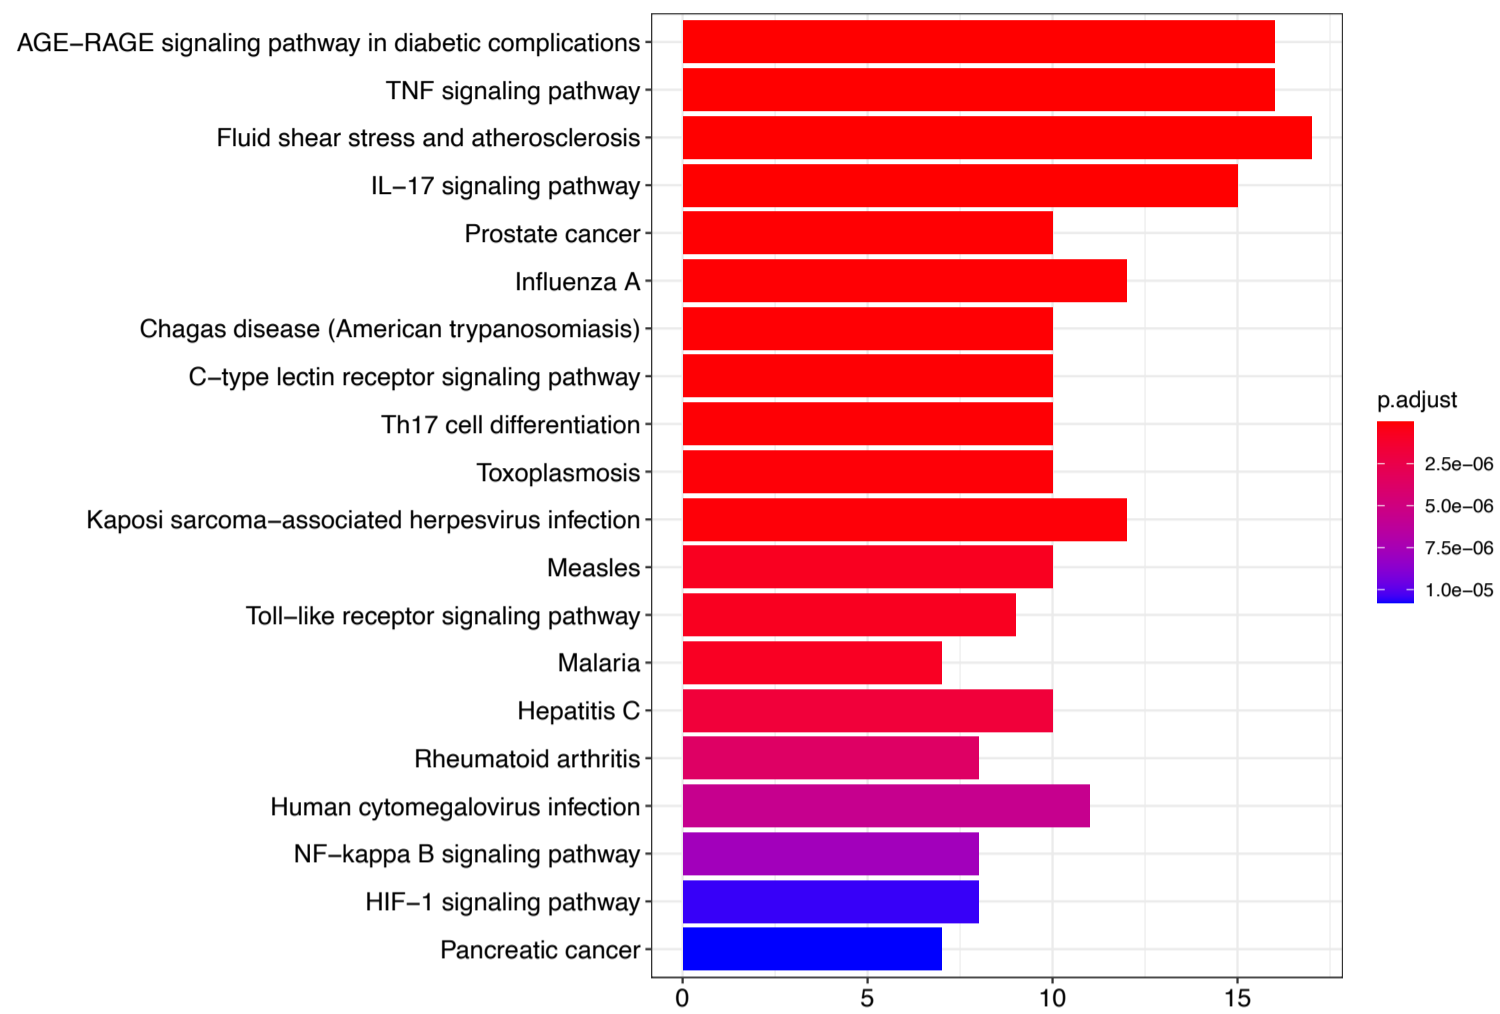

**b. Dayuanxiaodu (DYXX)**

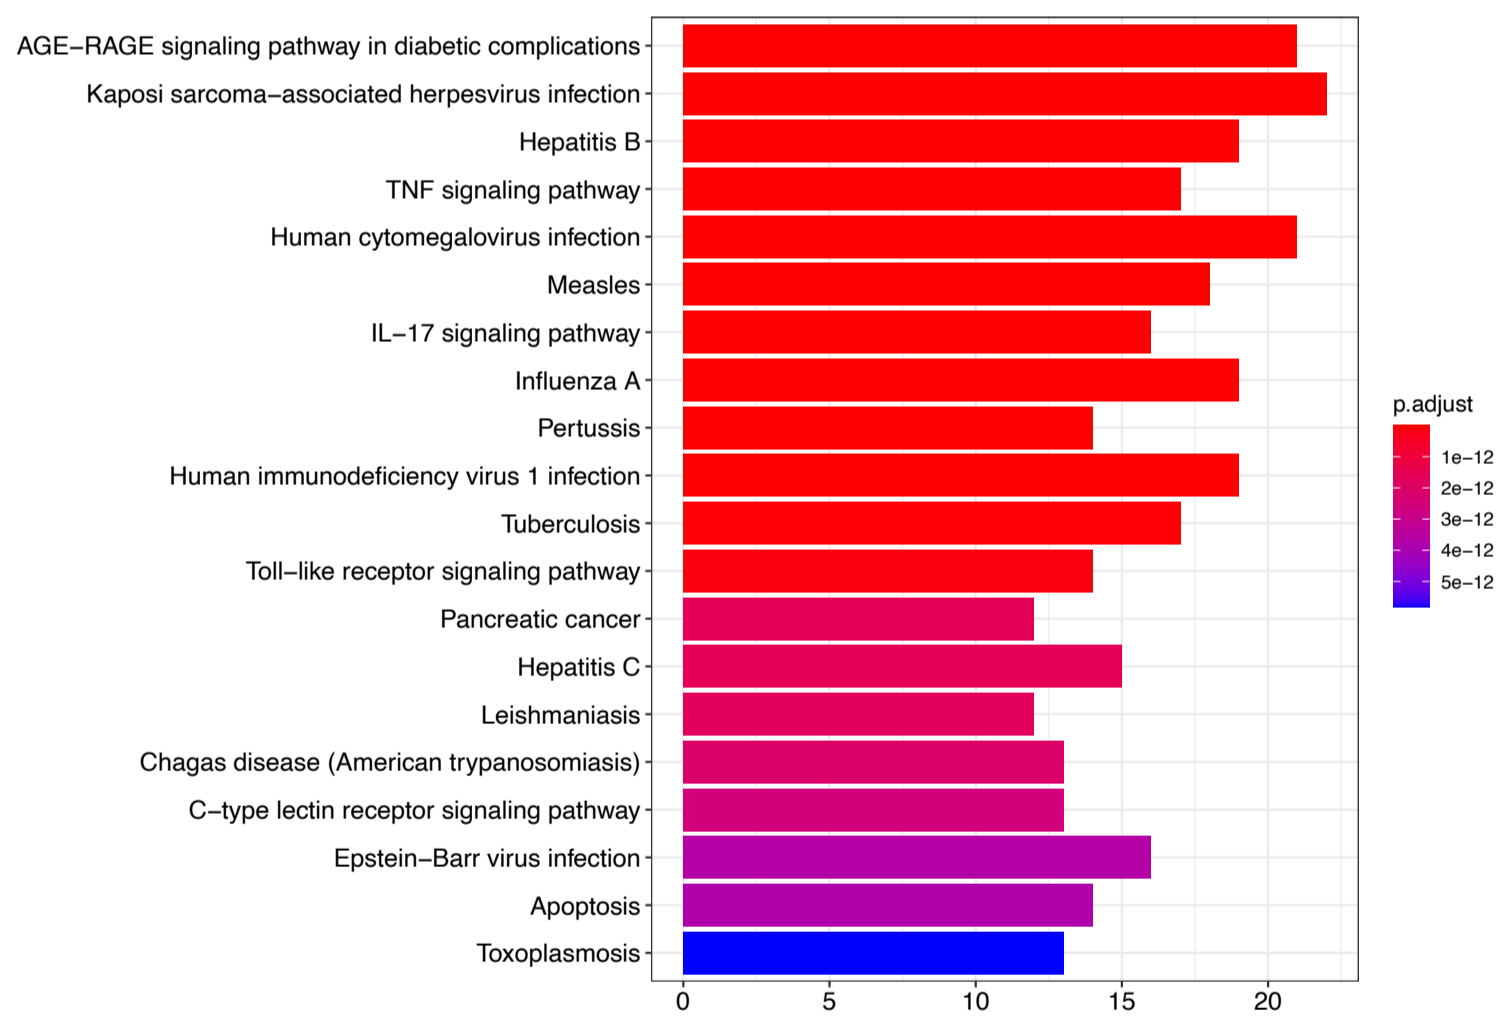

**c. Chaihuqingzao (CHQZ)**

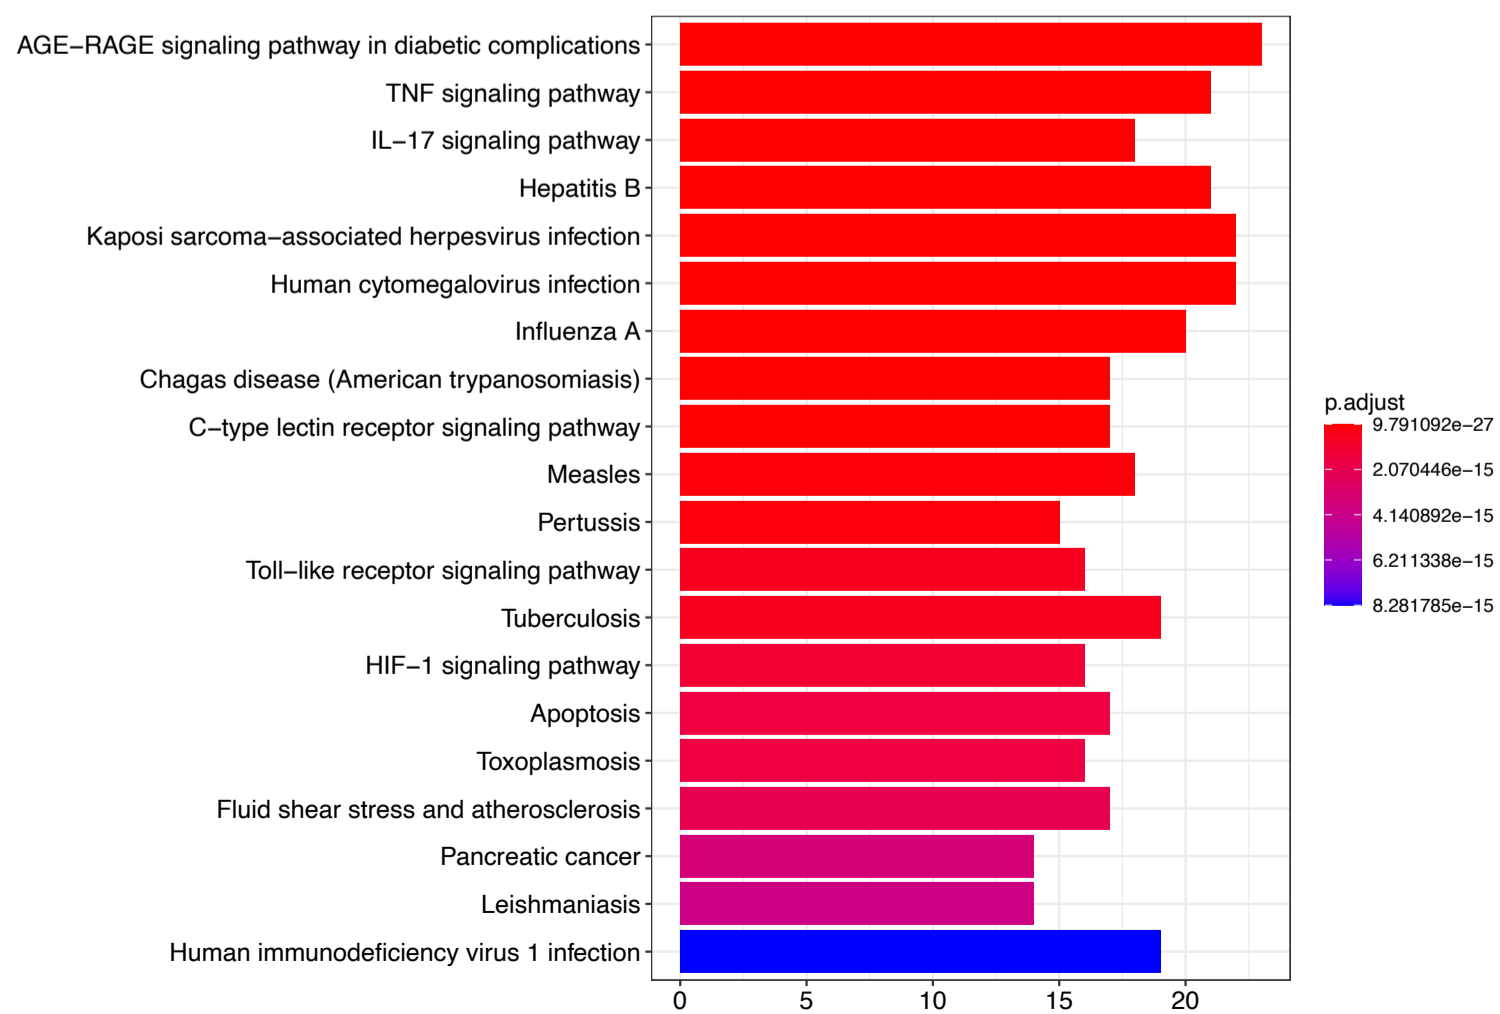

Supplement: mmc5.pdf [file mmc5.pdf]
