# Supplementary material
Source: PubMed Central journal article supplement (PMC7859723)
Supplement: mmc6.pdf [file mmc6.pdf]

**Table S1. Active ingredients of Yangyinjiedu (YYJD) herbal medicine.**

| <b>ID</b> | <b>Compound</b>                                                                                                                                      | <b>OB (%)</b> | <b>DL</b> |
|-----------|------------------------------------------------------------------------------------------------------------------------------------------------------|---------------|-----------|
| MOL000483 | (Z)-3-(4-hydroxy-3-methoxy-phenyl)-N-[2-(4-hydroxyphenyl)ethyl]acrylamide                                                                            | 118.35        | 0.26      |
| MOL010387 | 3-o-beta-d-glucopyranosyl-(1-2)-[beta-d-xylopyranosyl-(1-3)]-beta-d-glucopyranosyl-(1-4)-galactopyranosyl-25(S)-spirost-5(6)-en-3beta,14alpo-diol Qt | 104.58        | 0.79      |
| MOL010395 | 4',5,7-trihydroxy-6-methyl-8-methoxy-homoisoflavanone                                                                                                | 89.7          | 0.33      |
| MOL000332 | n-coumaroyltyramine                                                                                                                                  | 85.63         | 0.2       |
| MOL010411 | 4',5,7-trihydroxy-6-methyl-homoisoflavanone                                                                                                          | 82.94         | 0.27      |
| MOL009136 | Peraksine                                                                                                                                            | 82.58         | 0.78      |
| MOL006826 | Chebulic acid                                                                                                                                        | 72            | 0.32      |
| MOL003758 | Iristectorigenin (9CI)                                                                                                                               | 71.55         | 0.34      |
| MOL003759 | Iristectorigenin A                                                                                                                                   | 63.36         | 0.34      |
| MOL010396 | 4',5,7-trihydroxy-6,8-dimethyl-homoisoflavanone                                                                                                      | 59.76         | 0.3       |
| MOL002610 | ZINC00035529                                                                                                                                         | 58.39         | 0.22      |
| MOL010412 | 4'-methoxy-5,7-dihydroxy-6,8-dimethyl-homoisoflavanone                                                                                               | 57.14         | 0.34      |
| MOL009137 | (R)-(6-methoxy-4-quinolyl)-[(2R,4R,5S)-5-vinylquinuclidin-2-yl]methanol                                                                              | 55.88         | 0.4       |
| MOL003576 | (1R,3aS,4R,6aS)-1,4-bis(3,4-dimethoxyphenyl)-1,3,3a,4,6,6a-hexahydrofuro[4,3-c]furan                                                                 | 52.35         | 0.62      |
| MOL002605 | 11-Hydroxynumantenine                                                                                                                                | 50.79         | 0.71      |
| MOL002276 | Senoside E Qt                                                                                                                                        | 50.69         | 0.61      |
| MOL003753 | Dihydrokaempferide                                                                                                                                   | 50.56         | 0.27      |
| MOL000354 | Isorhamnetin                                                                                                                                         | 49.6          | 0.31      |
| MOL000351 | Rhamnazin                                                                                                                                            | 47.14         | 0.34      |
| MOL003769 | Irolone                                                                                                                                              | 46.87         | 0.36      |
| MOL009149 | Cheilanthifoline                                                                                                                                     | 46.51         | 0.72      |
| MOL000098 | Quercetin                                                                                                                                            | 46.43         | 0.28      |
| MOL001942 | Isoimperatorin                                                                                                                                       | 45.46         | 0.23      |
| MOL000179 | 2-Hydroxyisoxypopyl-3-hydroxy-7-isopentene-2,3-dihydrobenzofuran-5-carboxylic                                                                        | 45.2          | 0.2       |
| MOL003742 | Ardisianone A                                                                                                                                        | 44.22         | 0.25      |
| MOL000449 | Stigmasterol                                                                                                                                         | 43.83         | 0.76      |
| MOL000186 | Stigmasterol 3-O-beta-D-glucopyranoside Qt                                                                                                           | 43.83         | 0.76      |
| MOL000449 | Stigmasterol                                                                                                                                         | 43.83         | 0.76      |
| MOL002609 | Harmonyl                                                                                                                                             | 43.8          | 0.46      |
| MOL003741 | Anhydrobelachinal                                                                                                                                    | 43.57         | 0.78      |
| MOL003754 | Epianhydrobelachinal                                                                                                                                 | 43.57         | 0.78      |
| MOL001002 | Ellagic acid                                                                                                                                         | 43.06         | 0.43      |
| MOL001040 | (2R)-5,7-dihydroxy-2-(4-hydroxyphenyl)chroman-4-one                                                                                                  | 42.36         | 0.21      |
| MOL000422 | Kaempferol                                                                                                                                           | 41.88         | 0.24      |
| MOL001951 | Bergaptin                                                                                                                                            | 41.73         | 0.42      |
| MOL000188 | 3β-acetoxyatractylone                                                                                                                                | 40.57         | 0.22      |
| MOL000184 | NSC63551                                                                                                                                             | 39.25         | 0.76      |
| MOL010408 | Polygosides E Qt                                                                                                                                     | 38.73         | 0.78      |
| MOL003578 | Cycloartenol                                                                                                                                         | 38.69         | 0.78      |

|           |                                  |       |      |
|-----------|----------------------------------|-------|------|
| MOL003542 | 8-Isopentenyl-kaempferol         | 38.04 | 0.39 |
| MOL006376 | 7-Dehydrosigmasterol             | 37.42 | 0.75 |
| MOL000358 | Beta-sitosterol                  | 36.91 | 0.75 |
| MOL000085 | Beta-daucosterol_qt              | 36.91 | 0.75 |
| MOL000088 | Beta-sitosterol 3-O-glucoside_qt | 36.91 | 0.75 |
| MOL000092 | Daucosterin_qt                   | 36.91 | 0.76 |
| MOL000296 | Hederagenin                      | 36.91 | 0.75 |
| MOL000358 | Beta-sitosterol                  | 36.91 | 0.75 |
| MOL003773 | Mangiferolic acid                | 36.16 | 0.84 |
| MOL000006 | Luteolin                         | 36.16 | 0.25 |
| MOL001939 | Alloisoimperatorin               | 34.8  | 0.22 |
| MOL001941 | Ammidin                          | 34.55 | 0.22 |
| MOL001956 | Cnidilin                         | 32.69 | 0.28 |
| MOL003757 | Iristectorene B                  | 32.56 | 0.42 |
| MOL002322 | Isovitexin                       | 31.29 | 0.72 |
| MOL003743 | Belachinal                       | 31.24 | 0.64 |
| MOL002619 | Albaspidin AA                    | 31.16 | 0.36 |
| MOL001735 | Dinatin                          | 30.97 | 0.27 |
| MOL009135 | Ellipticine                      | 30.82 | 0.28 |
| MOL000173 | Wogonin                          | 30.68 | 0.23 |
| MOL002614 | Flavidin                         | 30.1  | 0.26 |
| MOL003744 | Belamcandal                      | 30.07 | 0.67 |

---
