# Supplementary material
Source: PubMed Central journal article supplement (PMC7859723)
Supplement: mmc7.pdf [file mmc7.pdf]

**Table S2. Active ingredients of Dayuanxiaodu (DYXX) herbal medicine.**

| <b>ID</b> | <b>Compound</b>                                                                                           | <b>OB (%)</b> | <b>DL</b> |
|-----------|-----------------------------------------------------------------------------------------------------------|---------------|-----------|
| MOL000483 | (Z)-3-(4-hydroxy-3-methoxy-phenyl)-N-[2-(4-hydroxyphenyl)ethyl]acrylamide                                 | 118.35        | 0.26      |
| MOL000631 | Coumaroyltyramine                                                                                         | 112.9         | 0.2       |
| MOL007132 | (2R)-3-(3,4-dihydroxyphenyl)-2-[(Z)-3-(3,4-dihydroxyphenyl)acryloyl]oxy-propionic acid                    | 109.38        | 0.35      |
| MOL002934 | Neobaicalein                                                                                              | 104.34        | 0.44      |
| MOL003330 | (-)-Phillygenin                                                                                           | 95.04         | 0.57      |
| MOL002311 | Glycyrol                                                                                                  | 90.78         | 0.67      |
| MOL013098 | [(9R)-8,8-dimethyl-2-oxo-9,10-dihydropyrano[6,5-h]chromen-9-yl] (Z)-2-methylbut-2-enoate                  | 87.48         | 0.37      |
| MOL012922 | l-SPD                                                                                                     | 87.35         | 0.54      |
| MOL003306 | ACon1_001697                                                                                              | 85.12         | 0.57      |
| MOL007747 | Chloranoside a qt                                                                                         | 84.11         | 0.23      |
| MOL003322 | Forsythinol                                                                                               | 81.25         | 0.57      |
| MOL000546 | Diosgenin                                                                                                 | 80.88         | 0.81      |
| MOL007742 | Istanbulin-A                                                                                              | 80.1          | 0.2       |
| MOL004644 | Sainfuran                                                                                                 | 79.91         | 0.23      |
| MOL007207 | Machiline                                                                                                 | 79.64         | 0.24      |
| MOL003370 | Onjixanthone I                                                                                            | 79.16         | 0.3       |
| MOL005017 | Phaseol                                                                                                   | 78.77         | 0.58      |
| MOL004841 | Licochalcone B                                                                                            | 76.76         | 0.19      |
| MOL002932 | Panicolin                                                                                                 | 76.26         | 0.29      |
| MOL005890 | Pachypodol                                                                                                | 75.06         | 0.4       |
| MOL012246 | 5,7,4'-trihydroxy-8-methoxyflavanone                                                                      | 74.24         | 0.26      |
| MOL012583 | (2R,3R,4S)-2-(3,4-dihydroxyphenyl)-4-(2,4,6-trihydroxyphenyl)chroman-3,5,7-triol                          | 72.41         | 0.64      |
| MOL013101 | Rutarin qt                                                                                                | 70.1          | 0.2       |
| MOL000791 | Bicuculline                                                                                               | 69.67         | 0.88      |
| MOL002927 | Skullcapflavone II                                                                                        | 69.51         | 0.44      |
| MOL007206 | Armepavine                                                                                                | 69.31         | 0.29      |
| MOL002911 | 2,6,2',4'-tetrahydroxy-6'-methoxychaleone                                                                 | 69.04         | 0.22      |
| MOL000433 | FA                                                                                                        | 68.96         | 0.71      |
| MOL000074 | (4E,6E)-1,7-bis(4-hydroxyphenyl)hepta-4,6-dien-3-one                                                      | 67.92         | 0.24      |
| MOL000004 | Procyanidin B1                                                                                            | 67.87         | 0.66      |
| MOL006405 | (1S)-1-(4-hydroxybenzyl)-2-methyl-3,4-dihydro-1H-isoquinoline-6,7-diol                                    | 67.14         | 0.23      |
| MOL003410 | Ziziphin qt                                                                                               | 66.95         | 0.62      |
| MOL003283 | (2R,3R,4S)-4-(4-hydroxy-3-methoxy-phenyl)-7-methoxy-2,3-dimethylol-tetralin-6-ol                          | 66.51         | 0.39      |
| MOL002937 | Dihydrooroxylin                                                                                           | 66.06         | 0.23      |
| MOL004903 | Liquiritin                                                                                                | 65.69         | 0.74      |
| MOL012577 | (2R,3R,10S)-2,10-bis(3,4-dihydroxyphenyl)-3,5-dihydroxy-3,4,9,10-tetrahydro-2H-pyrano[6,5-h]chromen-8-one | 65.26         | 0.93      |
| MOL013087 | Peucedanocoumarin II                                                                                      | 63.48         | 0.53      |
| MOL000569 | Digallate                                                                                                 | 61.85         | 0.26      |

|           |                                                                                                         |       |      |
|-----------|---------------------------------------------------------------------------------------------------------|-------|------|
| MOL003308 | (+)-pinoresinol monomethyl ether-4-D-beta-glucoside Qt                                                  | 61.2  | 0.57 |
| MOL004489 | Anemarsaponin F Qt                                                                                      | 60.06 | 0.79 |
| MOL013093 | Rubricauloside                                                                                          | 58.36 | 0.71 |
| MOL013095 | Sporidesmin                                                                                             | 58.31 | 0.76 |
| MOL012579 | (4R,8R,9R)-4,8-bis(3,4-dihydroxyphenyl)-5,9-dihydroxy-4,8,9,10-tetrahydro-3H-pyrano[6,5-h]chromen-2-one | 58.16 | 0.93 |
| MOL001677 | asperglaucide                                                                                           | 58.02 | 0.52 |
| MOL010857 | Sterigmato-cystin                                                                                       | 57.16 | 0.68 |
| MOL013187 | Cubebin                                                                                                 | 57.13 | 0.64 |
| MOL004792 | nodakenin                                                                                               | 57.12 | 0.69 |
| MOL000211 | Mairin                                                                                                  | 55.38 | 0.78 |
| MOL000228 | (2R)-7-hydroxy-5-methoxy-2-phenylchroman-4-one                                                          | 55.23 | 0.2  |
| MOL006821 | (-)-epigallocatechin-3-gallate                                                                          | 55.09 | 0.77 |
| MOL000492 | (+)-catechin                                                                                            | 54.83 | 0.24 |
| MOL010921 | estrone                                                                                                 | 53.56 | 0.32 |
| MOL004908 | Glabridin                                                                                               | 53.25 | 0.47 |
| MOL003295 | (+)-pinoresinol monomethyl ether                                                                        | 53.08 | 0.57 |
| MOL003290 | (3R,4R)-3,4-bis[(3,4-dimethoxyphenyl)methyl]oxolan-2-one                                                | 52.3  | 0.48 |
| MOL004497 | Hippeastrine                                                                                            | 51.65 | 0.62 |
| MOL005911 | 5-Hydroxy-7,4'-dimethoxyflavanon                                                                        | 51.54 | 0.27 |
| MOL013078 | praeruptorin E                                                                                          | 51.22 | 0.66 |
| MOL007154 | tanshinone iia                                                                                          | 49.89 | 0.4  |
| MOL010865 | Naphthol aS-bl phosphate                                                                                | 49.88 | 0.45 |
| MOL000096 | (-)-catechin                                                                                            | 49.68 | 0.24 |
| MOL000354 | isorhamnetin                                                                                            | 49.6  | 0.31 |
| MOL005921 | quercetin 7-O-β-D-glucoside                                                                             | 49.57 | 0.27 |
| MOL002915 | Salvigenin                                                                                              | 49.07 | 0.33 |
| MOL000073 | ent-Epicatechin                                                                                         | 48.96 | 0.24 |
| MOL004609 | Areapillin                                                                                              | 48.96 | 0.41 |
| MOL000073 | ent-Epicatechin                                                                                         | 48.96 | 0.24 |
| MOL013094 | 8-[(2R)-2,3-dihydroxy-3-methyl-butyl]-5,7-dimethoxy-coumarin                                            | 48.57 | 0.21 |
| MOL004628 | Octalupine                                                                                              | 47.82 | 0.28 |
| MOL005100 | 5,7-dihydroxy-2-(3-hydroxy-4-methoxyphenyl)chroman-4-one                                                | 47.74 | 0.27 |
| MOL004624 | Longikaurin A                                                                                           | 47.72 | 0.53 |
| MOL010863 | 3-acetyldeoxynivalenol                                                                                  | 47.27 | 0.31 |
| MOL013103 | 532-16-1                                                                                                | 46.57 | 0.44 |
| MOL013079 | dl-praeruptorin a                                                                                       | 46.46 | 0.53 |
| MOL000098 | quercetin                                                                                               | 46.43 | 0.28 |
| MOL004653 | (+)-Anomalin                                                                                            | 46.06 | 0.66 |
| MOL004653 | (+)-Anomalin                                                                                            | 46.06 | 0.66 |
| MOL010864 | 5,7-Dihydroxy-3',4',5'-trimethoxyflavon                                                                 | 46.01 | 0.37 |
| MOL010485 | EPA                                                                                                     | 45.66 | 0.21 |
| MOL010861 | Delta-D                                                                                                 | 45.66 | 0.48 |
| MOL001942 | isoimperatorin                                                                                          | 45.46 | 0.23 |
| MOL004373 | Anhydroicaritin                                                                                         | 45.41 | 0.44 |

|           |                                                                                                                                                |       |      |
|-----------|------------------------------------------------------------------------------------------------------------------------------------------------|-------|------|
| MOL013100 | (2S)-2-(1-hydroxy-1-methyl-ethyl)-9-[(2S,3R,4R,5S,6R)-3,4,5-trihydroxy-6-methylol-tetrahydropyran-2-yl]oxy-2,3-dihydrofuro[3,2-g]chromen-7-one | 45.33 | 0.73 |
| MOL000179 | 2-Hydroxyisoxypopyl-3-hydroxy-7-isopentene-2,3-dihydrobenzofuran-5-carboxylic                                                                  | 45.2  | 0.2  |
| MOL002917 | 5,2',6'-Trihydroxy-7,8-dimethoxyflavone                                                                                                        | 45.05 | 0.33 |
| MOL008206 | Moslosooflavone                                                                                                                                | 44.09 | 0.25 |
| MOL003347 | hyperforin                                                                                                                                     | 44.03 | 0.6  |
| MOL003348 | adhyperforin                                                                                                                                   | 44.03 | 0.61 |
| MOL000449 | Stigmasterol                                                                                                                                   | 43.83 | 0.76 |
| MOL010482 | WLN: 6OVR BVO6                                                                                                                                 | 43.74 | 0.24 |
| MOL001749 | ZINC03860434                                                                                                                                   | 43.59 | 0.35 |
| MOL001490 | bis[(2S)-2-ethylhexyl] benzene-1,2-dicarboxylate                                                                                               | 43.59 | 0.35 |
| MOL002879 | Diop                                                                                                                                           | 43.59 | 0.39 |
| MOL005922 | Acanthoside B                                                                                                                                  | 43.35 | 0.77 |
| MOL002897 | epiberberine                                                                                                                                   | 43.09 | 0.78 |
| MOL001002 | ellagic acid                                                                                                                                   | 43.06 | 0.43 |
| MOL004718 | $\alpha$ -spinasterol                                                                                                                          | 42.98 | 0.76 |
| MOL004355 | Spinasterol                                                                                                                                    | 42.98 | 0.76 |
| MOL012588 | 7-[[[(1S,4aS,6R,8aR)-6-hydroxy-5,5,8a-trimethyl-2-methylene-decalin-1-yl]methoxy]coumarin                                                      | 42.36 | 0.64 |
| MOL001645 | Linoleyl acetate                                                                                                                               | 42.1  | 0.2  |
| MOL003344 | $\beta$ -amyrin acetate                                                                                                                        | 42.06 | 0.74 |
| MOL007743 | ZINC00391893                                                                                                                                   | 41.92 | 0.2  |
| MOL000422 | Kaempferol                                                                                                                                     | 41.88 | 0.24 |
| MOL001951 | Bergaptin                                                                                                                                      | 41.73 | 0.42 |
| MOL007744 | Chloranthalactone A                                                                                                                            | 41.72 | 0.18 |
| MOL004528 | Icariin I                                                                                                                                      | 41.58 | 0.61 |
| MOL002928 | Oroxylin a                                                                                                                                     | 41.37 | 0.23 |
| MOL002914 | Eriodyctiol (flavanone)                                                                                                                        | 41.35 | 0.24 |
| MOL002910 | Carthamidin                                                                                                                                    | 41.15 | 0.24 |
| MOL003365 | Lactucasterol                                                                                                                                  | 40.99 | 0.85 |
| MOL007218 | Remerin                                                                                                                                        | 40.75 | 0.52 |
| MOL004798 | delphinidin                                                                                                                                    | 40.63 | 0.28 |
| MOL002032 | DNOP                                                                                                                                           | 40.59 | 0.4  |
| MOL000188 | 3 $\beta$ -acetoxyaatractylone                                                                                                                 | 40.57 | 0.22 |
| MOL003281 | 20(S)-dammar-24-ene-3 $\beta$ ,20-diol-3-acetate                                                                                               | 40.23 | 0.82 |
| MOL002644 | Phellopterin                                                                                                                                   | 40.19 | 0.28 |
| MOL002776 | Baicalin                                                                                                                                       | 40.12 | 0.75 |
| MOL002913 | Dihydrobaicalin_qt                                                                                                                             | 40.04 | 0.21 |
| MOL002211 | 11,14-eicosadienoic acid                                                                                                                       | 39.99 | 0.2  |
| MOL013081 | Decussine                                                                                                                                      | 39.83 | 0.65 |
| MOL000525 | Norwogonin                                                                                                                                     | 39.4  | 0.21 |
| MOL010415 | 11,13-Eicosadienoic acid, methyl ester                                                                                                         | 39.28 | 0.23 |
| MOL013077 | Decursin                                                                                                                                       | 39.27 | 0.38 |
| MOL000184 | NSC63551                                                                                                                                       | 39.25 | 0.76 |
| MOL002926 | dihydrooroxylin A                                                                                                                              | 38.72 | 0.23 |
| MOL004492 | Chrysanthemaxanthin                                                                                                                            | 38.72 | 0.58 |
| MOL005918 | Phenanthrone                                                                                                                                   | 38.7  | 0.33 |
| MOL003578 | Cycloartenol                                                                                                                                   | 38.69 | 0.78 |
| MOL013083 | Skimmin (8CI)                                                                                                                                  | 38.35 | 0.32 |

|           |                                                                                                                                                                                                         |       |      |
|-----------|---------------------------------------------------------------------------------------------------------------------------------------------------------------------------------------------------------|-------|------|
| MOL005884 | Patchoulan 1,12-diol                                                                                                                                                                                    | 38.17 | 0.25 |
| MOL012266 | Rivularin                                                                                                                                                                                               | 37.94 | 0.37 |
| MOL000953 | CLR                                                                                                                                                                                                     | 37.87 | 0.68 |
| MOL005916 | Irisolidone                                                                                                                                                                                             | 37.78 | 0.3  |
| MOL007214 | (+)-Leucocyanidin                                                                                                                                                                                       | 37.61 | 0.27 |
| MOL013076 | (8S,9R)-9-hydroxy-8-(2-hydroxypropan-2-yl)-8,9-dihydrofuro[2,3-h]chromen-2-one                                                                                                                          | 37.3  | 0.2  |
| MOL005573 | Genkwanin                                                                                                                                                                                               | 37.13 | 0.24 |
| MOL002908 | 5,8,2'-Trihydroxy-7-methoxyflavone                                                                                                                                                                      | 37.01 | 0.27 |
| MOL002925 | 5,7,2',6'-Tetrahydroxyflavone                                                                                                                                                                           | 37.01 | 0.24 |
| MOL000358 | beta-sitosterol                                                                                                                                                                                         | 36.91 | 0.75 |
| MOL000085 | beta-daucosterol_qt                                                                                                                                                                                     | 36.91 | 0.75 |
| MOL000088 | beta-sitosterol 3-O-glucoside_qt                                                                                                                                                                        | 36.91 | 0.75 |
| MOL000092 | Daucosterin_qt                                                                                                                                                                                          | 36.91 | 0.76 |
| MOL000085 | beta-daucosterol_qt                                                                                                                                                                                     | 36.91 | 0.75 |
| MOL000088 | beta-sitosterol 3-O-glucoside_qt                                                                                                                                                                        | 36.91 | 0.75 |
| MOL000359 | Sitosterol                                                                                                                                                                                              | 36.91 | 0.75 |
| MOL008173 | Daucosterol_qt                                                                                                                                                                                          | 36.91 | 0.75 |
| MOL000358 | beta-sitosterol                                                                                                                                                                                         | 36.91 | 0.75 |
| MOL012593 | isohumbertiol-3-o- $\{\alpha$ -L-rhamnopyranosyl(1 $\rightarrow$ 4)- $\alpha$ -L-rhamnopyranosyl(1 $\rightarrow$ 2)- $[\alpha$ -L-rhamnopyranosyl(1 $\rightarrow$ 6)] $\}$ - $\beta$ -D-glucopyranoside | 36.75 | 0.59 |
| MOL012245 | 5,7,4'-trihydroxy-6-methoxyflavanone                                                                                                                                                                    | 36.63 | 0.27 |
| MOL002933 | 5,7,4'-Trihydroxy-8-methoxyflavone                                                                                                                                                                      | 36.56 | 0.27 |
| MOL003305 | Phillyrin                                                                                                                                                                                               | 36.4  | 0.86 |
| MOL004568 | Engelitin                                                                                                                                                                                               | 36.27 | 0.7  |
| MOL000006 | Luteolin                                                                                                                                                                                                | 36.16 | 0.25 |
| MOL003773 | Mangiferolic acid                                                                                                                                                                                       | 36.16 | 0.84 |
| MOL012556 | 23-trans-p-coumarylformic acid                                                                                                                                                                          | 36.08 | 0.32 |
| MOL010862 | $\alpha$ -tocopheryl quinone                                                                                                                                                                            | 35.91 | 0.5  |
| MOL005088 | Nivalenol                                                                                                                                                                                               | 35.68 | 0.28 |
| MOL004540 | Anemarsaponin C_qt                                                                                                                                                                                      | 35.5  | 0.87 |
| MOL004514 | Timosaponin B III_qt                                                                                                                                                                                    | 35.26 | 0.87 |
| MOL001689 | Acacetin                                                                                                                                                                                                | 34.97 | 0.24 |
| MOL001939 | Alloisoimperatorin                                                                                                                                                                                      | 34.8  | 0.22 |
| MOL001941 | Ammidin                                                                                                                                                                                                 | 34.55 | 0.22 |
| MOL000522 | Arctiin                                                                                                                                                                                                 | 34.45 | 0.84 |
| MOL007213 | Nuciferin                                                                                                                                                                                               | 34.43 | 0.4  |
| MOL002909 | 5,7,2,5-tetrahydroxy-8,6-dimethoxyflavone                                                                                                                                                               | 33.82 | 0.45 |
| MOL002372 | (6Z,10E,14E,18E)-2,6,10,15,19,23-hexamethyltetracos-2,6,10,14,18,22-hexaene                                                                                                                             | 33.55 | 0.42 |
| MOL001506 | Supraene                                                                                                                                                                                                | 33.55 | 0.42 |
| MOL002372 | (6Z,10E,14E,18E)-2,6,10,15,19,23-hexamethyltetracos-2,6,10,14,18,22-hexaene                                                                                                                             | 33.55 | 0.42 |
| MOL007210 | O-Nornuciferine                                                                                                                                                                                         | 33.52 | 0.36 |
| MOL002714 | Baicalein                                                                                                                                                                                               | 33.52 | 0.21 |
| MOL012617 | Torulene                                                                                                                                                                                                | 33.49 | 0.55 |
| MOL003315 | 3beta-Acetyl-20,25-epoxydammarane-24alpha-ol                                                                                                                                                            | 33.07 | 0.79 |
| MOL001956 | Cnidilin                                                                                                                                                                                                | 32.69 | 0.28 |
| MOL007180 | Vitamin-E                                                                                                                                                                                               | 32.29 | 0.7  |

|           |                                                                                                                                                          |       |      |
|-----------|----------------------------------------------------------------------------------------------------------------------------------------------------------|-------|------|
| MOL001663 | (4aS,6aR,6aS,6bR,8aR,10R,12aR,14bS)-10-hydroxy-2,2,6a,6b,9,9,12a-heptamethyl-1,3,4,5,6,6a,7,8,8a,10,11,12,13,14b-tetradecahydronicene-4a-carboxylic acid | 32.03 | 0.76 |
| MOL004598 | 3,5,6,7-tetramethoxy-2-(3,4,5-trimethoxyphenyl)chromone                                                                                                  | 31.97 | 0.59 |
| MOL000552 | 5,2'-Dihydroxy-6,7,8-trimethoxyflavone                                                                                                                   | 31.71 | 0.35 |
| MOL010922 | Diisooctyl succinate                                                                                                                                     | 31.62 | 0.23 |
| MOL004648 | Troloxerutin                                                                                                                                             | 31.6  | 0.28 |
| MOL012581 | (4S,8R,9R)-4,8-bis(3,4-dihydroxyphenyl)-5,9-dihydroxy-4,8,9,10-tetrahydro-3H-pyrano[6,5-h]chromen-2-one                                                  | 31.32 | 0.93 |
| MOL002322 | Isovitexin                                                                                                                                               | 31.29 | 0.72 |
| MOL010846 | Deoxynivalenol standard                                                                                                                                  | 31.16 | 0.25 |
| MOL005923 | 3,23-dihydroxy-12-oleanen-28-oic acid                                                                                                                    | 30.86 | 0.86 |
| MOL010489 | Resivit                                                                                                                                                  | 30.84 | 0.27 |
| MOL005030 | Gondoic acid                                                                                                                                             | 30.7  | 0.2  |
| MOL000173 | Wogonin                                                                                                                                                  | 30.68 | 0.23 |
| MOL001458 | Coptisine                                                                                                                                                | 30.67 | 0.86 |
| MOL004542 | Anemarsaponin E_qt                                                                                                                                       | 30.67 | 0.86 |
| MOL004702 | Saikosaponin c_qt                                                                                                                                        | 30.5  | 0.63 |
| MOL012578 | Cinchonain 1a                                                                                                                                            | 30.12 | 0.93 |
| MOL000490 | Petunidin                                                                                                                                                | 30.05 | 0.31 |
| MOL007217 | Leucodelphinidin                                                                                                                                         | 30.02 | 0.31 |

---
