# Supplementary material
Source: PubMed Central journal article supplement (PMC7859723)
Supplement: mmc8.pdf [file mmc8.pdf]

**Table S3. Active ingredients of Chaihuqingzao (CHQZ) herbal medicine.**

| ID        | Compound                                                                                                   | OB (%) | DL   |
|-----------|------------------------------------------------------------------------------------------------------------|--------|------|
| MOL007132 | (2R)-3-(3,4-dihydroxyphenyl)-2-[(Z)-3-(3,4-dihydroxyphenyl)acryloyl]oxy-propionic acid                     | 109.38 | 0.35 |
| MOL011737 | Divaricataacid                                                                                             | 87     | 0.32 |
| MOL005815 | Citromitin                                                                                                 | 86.9   | 0.51 |
| MOL007747 | Chloranoside a_qt                                                                                          | 84.11  | 0.23 |
| MOL007742 | Istanbulin-A                                                                                               | 80.1   | 0.2  |
| MOL004644 | Sainfuran                                                                                                  | 79.91  | 0.23 |
| MOL000011 | (2R,3R)-3-(4-hydroxy-3-methoxy-phenyl)-5-methoxy-2-methylol-2,3-dihydropyrano[5,6-h][1,4]benzodioxin-9-one | 68.83  | 0.66 |
| MOL004580 | cis-Dihydroquercetin                                                                                       | 66.44  | 0.27 |
| MOL005828 | Nobiletin                                                                                                  | 61.67  | 0.52 |
| MOL011732 | Anomalin                                                                                                   | 59.65  | 0.66 |
| MOL004328 | Naringenin                                                                                                 | 59.29  | 0.21 |
| MOL002610 | Zinc00035529                                                                                               | 58.39  | 0.22 |
| MOL013187 | Cubebin                                                                                                    | 57.13  | 0.64 |
| MOL002605 | 11-Hydroxynumantenine                                                                                      | 50.79  | 0.71 |
| MOL011730 | 11-hydroxy-sec-o-beta-d-glucosylhamaudol_qt                                                                | 50.24  | 0.27 |
| MOL000354 | Isorhamnetin                                                                                               | 49.6   | 0.31 |
| MOL004609 | Areapillin                                                                                                 | 48.96  | 0.41 |
| MOL004628 | Octalupine                                                                                                 | 47.82  | 0.28 |
| MOL005100 | 5,7-dihydroxy-2-(3-hydroxy-4-methoxyphenyl)chroman-4-one                                                   | 47.74  | 0.27 |
| MOL004624 | Longikaurin A                                                                                              | 47.72  | 0.53 |
| MOL000098 | Quercetin                                                                                                  | 46.43  | 0.28 |
| MOL007179 | Linolenic acid ethyl ester                                                                                 | 46.1   | 0.2  |
| MOL004653 | (+)-Anomalin                                                                                               | 46.06  | 0.66 |
| MOL001942 | Isoimperatorin                                                                                             | 45.46  | 0.23 |
| MOL004373 | Anhydroicaritin                                                                                            | 45.41  | 0.44 |
| MOL000179 | 2-Hydroxyisoxypopyl-3-hydroxy-7-isopentene-2,3-dihydrobenzofuran-5-carboxylic                              | 45.2   | 0.2  |
| MOL005996 | 2-O-methyl-3-O-β-D-glucopyranosyl platycogenate A                                                          | 45.15  | 0.25 |
| MOL007991 | 2-methoxy-9,10-dihydrophenanthrene-4,5-diol                                                                | 44.97  | 0.18 |
| MOL007165 | 10α-cucurbita-5,24-diene-3β-ol                                                                             | 44.02  | 0.74 |
| MOL007175 | karounidiol 3-o-benzoate                                                                                   | 43.99  | 0.5  |
| MOL000186 | Stigmasterol 3-O-beta-D-glucopyranoside_qt                                                                 | 43.83  | 0.76 |
| MOL000449 | Stigmasterol                                                                                               | 43.83  | 0.76 |
| MOL002609 | Harmonyl                                                                                                   | 43.8   | 0.46 |
| MOL011749 | Phelloptorin                                                                                               | 43.39  | 0.28 |
| MOL003485 | Phthalic acid, isobutyl undecyl ester                                                                      | 43.33  | 0.36 |
| MOL004718 | α-spinasterol                                                                                              | 42.98  | 0.76 |
| MOL004355 | Spinasterol                                                                                                | 42.98  | 0.76 |
| MOL001040 | (2R)-5,7-dihydroxy-2-(4-hydroxyphenyl)chroman-4-one                                                        | 42.36  | 0.21 |
| MOL001645 | Linoleyl acetate                                                                                           | 42.1   | 0.2  |
| MOL001494 | Mandenol                                                                                                   | 42     | 0.19 |
| MOL007743 | ZINC00391893                                                                                               | 41.92  | 0.2  |
| MOL000422 | Kaempferol                                                                                                 | 41.88  | 0.24 |

|           |                                                               |       |      |
|-----------|---------------------------------------------------------------|-------|------|
| MOL007744 | Chloranthalactone A                                           | 41.72 | 0.18 |
| MOL003479 | Cycloartenol acetate                                          | 41.11 | 0.8  |
| MOL000188 | 3 $\beta$ -acetoxyatractylone                                 | 40.57 | 0.22 |
| MOL002644 | Phellopterin                                                  | 40.19 | 0.28 |
| MOL002776 | Baicalin                                                      | 40.12 | 0.75 |
| MOL006070 | Robinin                                                       | 39.84 | 0.71 |
| MOL007514 | Methyl icoso-11,14-dienoate                                   | 39.67 | 0.23 |
| MOL013077 | Decursin                                                      | 39.27 | 0.38 |
| MOL000184 | NSC63551                                                      | 39.25 | 0.76 |
| MOL006026 | Dimethyl 2-O-methyl-3-O-a-D-glucopyranosyl<br>platycogenate A | 39.21 | 0.25 |
| MOL011753 | 5-O-Methylvisamminol                                          | 37.99 | 0.25 |
| MOL006756 | Schottenol                                                    | 37.42 | 0.75 |
| MOL000085 | beta-daucosterol_qt                                           | 36.91 | 0.75 |
| MOL000088 | beta-sitosterol 3-O-glucoside_qt                              | 36.91 | 0.75 |
| MOL000092 | Daucosterin_qt                                                | 36.91 | 0.76 |
| MOL000359 | Sitosterol                                                    | 36.91 | 0.75 |
| MOL000358 | beta-sitosterol                                               | 36.91 | 0.75 |
| MOL000359 | Sitosterol                                                    | 36.91 | 0.75 |
| MOL007172 | 7-oxo-dihydrokaro-unidiol                                     | 36.85 | 0.75 |
| MOL005530 | Hydroxygenkwanin                                              | 36.47 | 0.27 |
| MOL003588 | Prangenidin                                                   | 36.31 | 0.22 |
| MOL004568 | Engelitin                                                     | 36.27 | 0.7  |
| MOL000006 | Luteolin                                                      | 36.16 | 0.25 |
| MOL001689 | Acacetin                                                      | 34.97 | 0.24 |
| MOL001941 | Ammidin                                                       | 34.55 | 0.22 |
| MOL002883 | Ethyl oleate (NF)                                             | 32.4  | 0.19 |
| MOL007180 | Vitamin E                                                     | 32.29 | 0.7  |
| MOL011747 | Ledebouriellol                                                | 32.05 | 0.51 |
| MOL004598 | 3,5,6,7-tetramethoxy-2-(3,4,5-<br>trimethoxyphenyl)chromone   | 31.97 | 0.59 |
| MOL011740 | Divaricatol                                                   | 31.65 | 0.38 |
| MOL004648 | Troxerutin                                                    | 31.6  | 0.28 |
| MOL002619 | Albaspidin AA                                                 | 31.16 | 0.36 |
| MOL002881 | Diosmetin                                                     | 31.14 | 0.27 |
| MOL000173 | Wogonin                                                       | 30.68 | 0.23 |
| MOL004702 | Saikosaponin c_qt                                             | 30.5  | 0.63 |
| MOL007171 | 5-dehydrokarounidiol                                          | 30.23 | 0.77 |
| MOL002614 | Flavidin                                                      | 30.1  | 0.26 |
| MOL000490 | Petunidin                                                     | 30.05 | 0.31 |

---
